# Supplementary material
Source: PubMed Central journal article supplement (PMC5625398)
Supplement: JCM.00788-17_zjm999095673s4.pdf [file JCM.00788-17_zjm999095673s4.pdf]

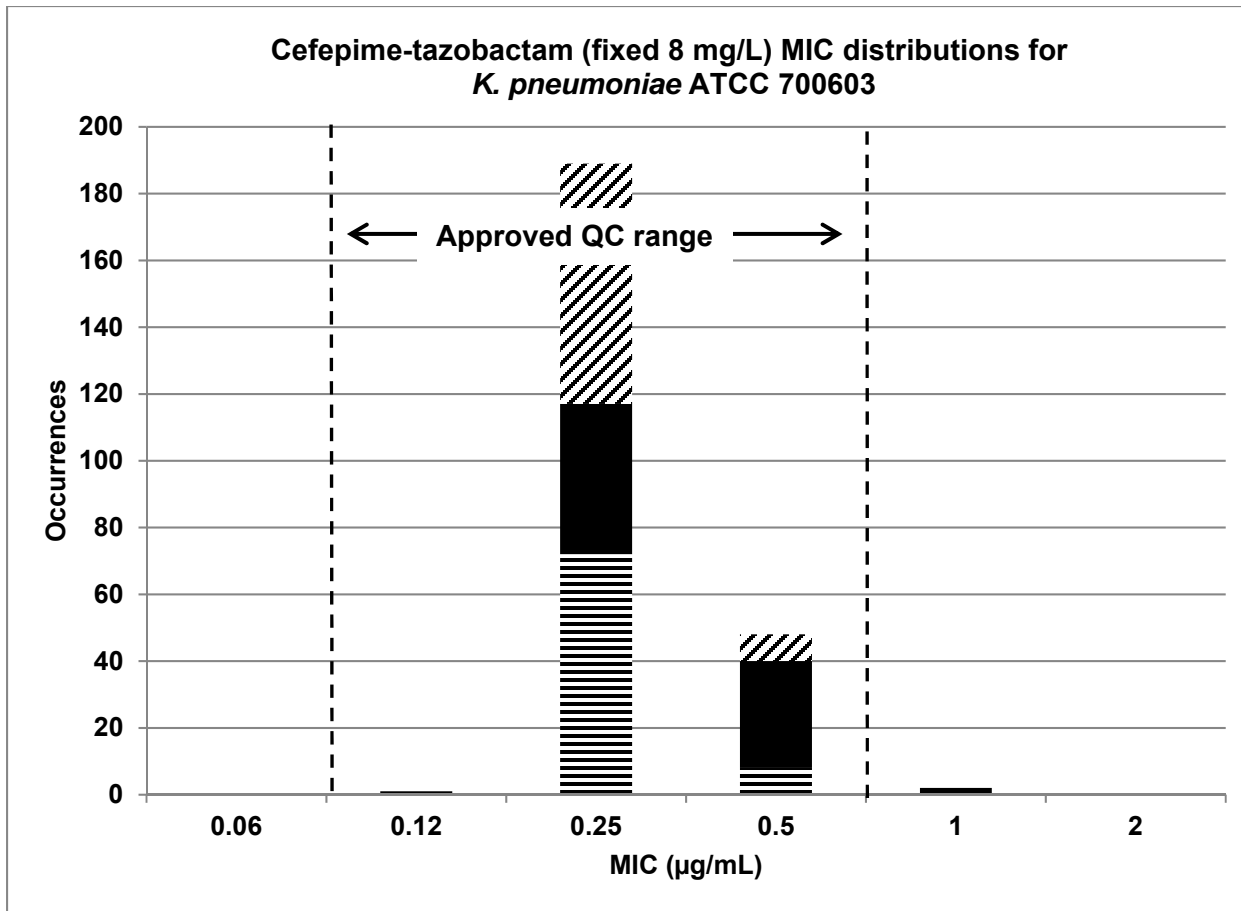

**Figure S4:** Cefepime-tazobactam (fixed 8 mg/L) MIC distributions for *K. pneumoniae* (ATCC 700603) by the broth microdilution testing method

Legend: Medium A Medium B Medium C
