# Supplementary material
Source: PubMed Central journal article supplement (PMC5625398)
Supplement: JCM.00788-17_zjm999095673s7.pdf [file JCM.00788-17_zjm999095673s7.pdf]

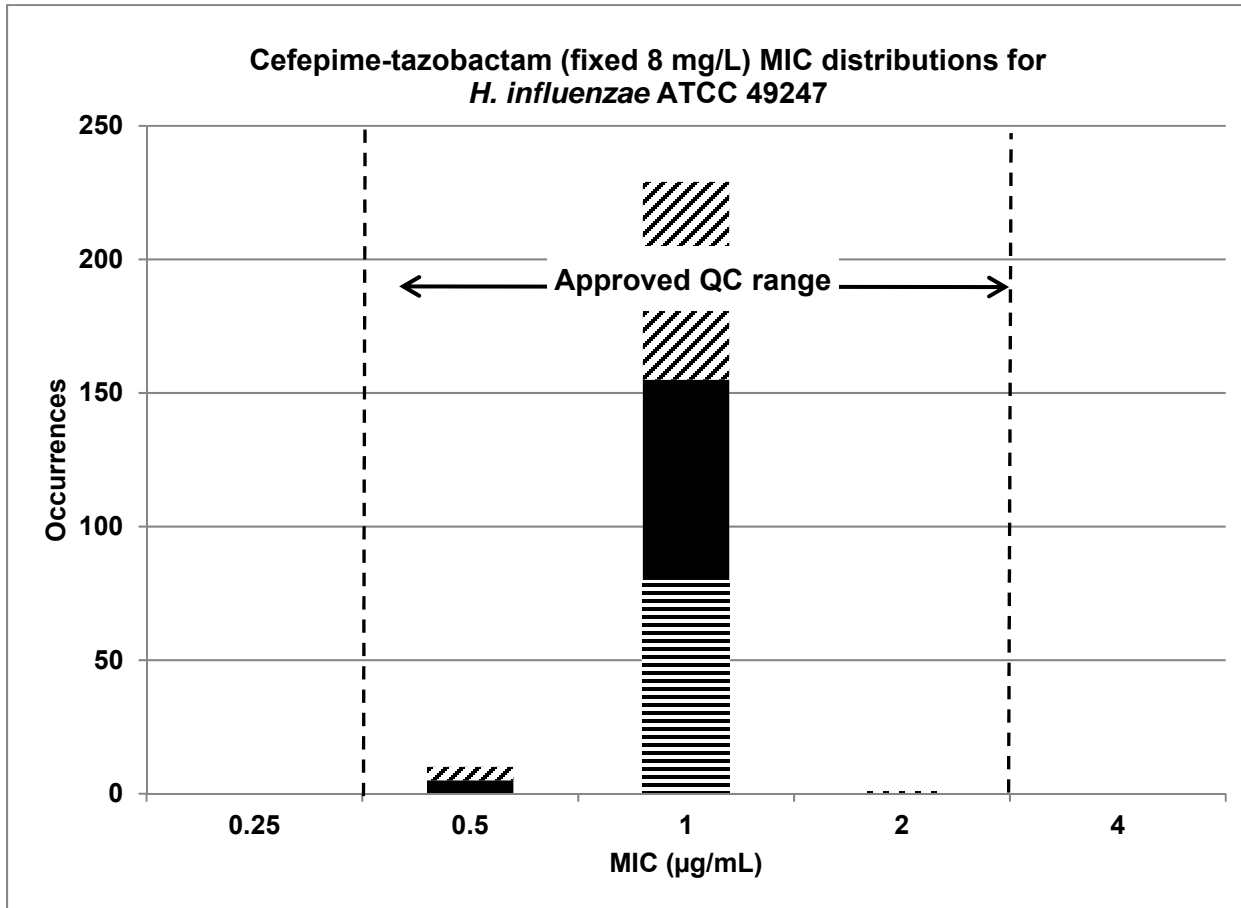

**Figure S7** Cefepime-tazobactam (fixed 8 mg/L) MIC distributions for *H. influenzae* (ATCC 49247) by the broth microdilution testing method

Legend: Medium A Medium B Medium C
